# Supplementary material for: Endocrine Signals Altered by Heat Stress Impact Dairy Cow Mammary Cellular Processes at Different Stages of the Dry Period
Source: PubMed Central journal article supplement (PMC7930950; doi:10.3390/ani11020563), 2021-02-21
Supplement: animals-11-00563-s001.pdf [file animals-11-00563-s001.pdf]

Supplementary Material

# Endocrine Signals Altered by Heat Stress Impact Dairy Cow Mammary Cellular Processes at Different Stages of the Dry Period

Véronique Ouellet <sup>1</sup>, João Negrao <sup>1,2</sup>, Amy L. Skibiel <sup>1,†</sup>, Valerie A. Lantigua <sup>1</sup>, Thiago F. Fabris <sup>1</sup>, Marcela G. Marrero <sup>1</sup>, Bethany Dado-Senn <sup>1,‡</sup>, Jimena Laporta <sup>1,‡</sup> and Geoffrey E. Dahl <sup>1,\*</sup>

<sup>1</sup> Department of Animal Sciences, University of Florida, Gainesville, FL, 32611, USA; veronique.ouellet.6@ufl.edu (V.O.); jnegrao@usp.br (J.N.); askibiel@uidaho.edu (A.L.S.); vlantigua@ufl.edu (V.A.L.); tfabris89@gmail.com (T.F.F.); marcela.marrero@ufl.edu (M.G.M.); bethanydado@ufl.edu (B.D.-S.); jlaporta@wisc.edu (J.L.)

<sup>2</sup> Department of Basic Sciences, Faculty of Animal Science and Food Engineering, University of Sao Paulo, Pirassununga, SP, USA

\* Correspondence: gdahl@ufl.edu; Tel.: +1-352-294-6980; Fax: +1-352-392-5595

† Current address: Department of Animal and Veterinary Science, University of Idaho, Moscow, ID 83844, USA.

‡ Current address: Department of Animal and Dairy Sciences, University of Wisconsin Madison, WI 53706, USA.

**Citation:** Ouellet, V.; Negrao, J.; Skibiel, A.L.; Lantigua, V.A.; Fabris, T.F.; Marrero, M.G.; Dado-Senn, B.; Laporta, J.; Dahl, G.E. Endocrine Signals Altered by Heat Stress Impact Dairy Cow Mammary Cellular Processes at Different Stages of the Dry Period. *Animals* **2021**, *11*, 563. <https://doi.org/10.3390/ani11020563>

Academic Editor: Jong-Eun Park and Himansu Kumar

Received: 12 January 2021

Accepted: 15 February 2021

Published: 21 February 2021

**Publisher's Note:** MDPI stays neutral with regard to jurisdictional claims in published maps and institutional affiliations.

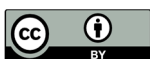

**Copyright:** © 2021 by the authors. Submitted for possible open access publication under the terms and conditions of the Creative Commons Attribution (CC BY) license (<http://creativecommons.org/licenses/by/4.0/>).

**Table S1.** Primers used in quantitative real-Time PCR assay gene expression.

| Gene   | Primer  | Sequence (5'-3')           | Accession No.  |
|--------|---------|----------------------------|----------------|
| ACTB   | Forward | ACACCTTCTACAATGAGCTG       | NM_173979.3    |
|        | Reverse | CTGCTTGCTGATCCACATCT       |                |
| AIFM1  | Forward | GGCTTCCTTGGTAGCGAACTGG     | NM_001192984.1 |
|        | Reverse | GTCCAGTTGCTGAGGTATTCGG     |                |
| AKT1   | Forward | CTGCACAAGCGAGGTGAGTA       | NM_173986.2    |
|        | Reverse | GAGAAGTTGTTGAGGGGCGA       |                |
| AKT2   | Forward | CATCCTCATGGAAGAGATCCGC     | NM_001206146.1 |
|        | Reverse | GAGGAAGAACCTGTGCTCCATG     |                |
| AMBRA1 | Forward | CTCTTCCTCAGACAACCAGGGT     | NM_001034522.2 |
|        | Reverse | TCCAAGCGAAGGTGCAGACATC     |                |
| APAF1  | Forward | GCCAAGCAGGAGGTGATAATG      | NM_001191507.1 |
|        | Reverse | GACCATCCTCAGAAAAGCAGGC     |                |
| ATG3   | Forward | GGTTGTTCCGGCTATGATGAG      | NM_001075364.1 |
|        | Reverse | GGGAGATGAGGGTGATTTTC       |                |
| ATG5   | Forward | TTTGAATATGAAGGCACACC       | NM_001034579.2 |
|        | Reverse | TGTAAACCCATCCAGAGTTG       |                |
| ATG7   | Forward | CGTTGCCACAGCATCATCTTC      | NM_001083795.2 |
|        | Reverse | CACTGAGGTTCAACCATCCTTGG    |                |
| BACH2  | Forward | CTGCCGCAAAGGAAACTGGAC      | XM_024996978.1 |
|        | Reverse | GGAAAGGCAGGAGAAGTTGTCC     |                |
| BAD    | Forward | TCCCAGAGTTTGAGCAGAGTG      | NM_001035459.2 |
|        | Reverse | TTAGCCAGTGCTTGCTGAGAC      |                |
| BAX    | Forward | GGGTTGTCGCCCTTTTCTACTT     | NM_173894.1    |
|        | Reverse | CGCTCTCGAAGGAAGTCCAATG     |                |
| BCL2   | Forward | ACAGCATCGCCCTGTGGATG       | NM_001166486.1 |
|        | Reverse | GTGCCTTCAGAGACAGCCAG       |                |
| BECN1  | Forward | GATGGAATAGGAACCACCAC       | NM_001033627.2 |
|        | Reverse | AGTTGAGAAAGGCGAGACAC       |                |
| BNIP3  | Forward | TCAGCATGAGGAACACGAGCGT     | NM_001076366.1 |
|        | Reverse | GAGGTTGTCAGACGCCTTCCAA     |                |
| BRAF   | Forward | AACGAGACCGATCCTCATCAGC     | XM_024991194.1 |
|        | Reverse | GGTAGCAGACAAACCTGTGGTTG    |                |
| CASP3  | Forward | TGAAATACGAAGTCAGGATTA      | NM_001077840.1 |
|        | Reverse | GTCCGTTGGTTCCAAAAATG       |                |
| CASP8  | Forward | TTTAGCATAGCACGGAAGCA       | NM_001045970.2 |
|        | Reverse | TATCCAAAGCGTCTGCATCA       |                |
| CASP9  | Forward | GTTTGAGGACCTTCGACCAGCT     | NM_001205504.1 |
|        | Reverse | CAACGTACCAGGAGCCACTCTT     |                |
| CD4    | Forward | CGGAATTCGCCCCTTCTCCAGCAGAT | NM_001103225.1 |
|        | Reverse | CCGCTCGAGGATGGCAACACAAAGC  |                |
| CDKN1B | Forward | TGTCAAACGTGCGAGTGTCTA      | NM_001100346.1 |
|        | Reverse | CTCTGCAGTGCTTCTCCAAGT      |                |
| CREB1  | Forward | GACCACTGATGGACAGCAGATC     | NM_174285.1    |
|        | Reverse | GAGGATGCCATAACAACCTCCAGG   |                |
| CSN2   | Forward | GCTATGGCTCCTAAGCACAAAGA    | BC_111172.1    |
|        | Reverse | GGAAACATGACAGTTGGAGGAAG    |                |
| CXCL2  | Forward | GGCAGAAAGCTTGTCTCAACCC     | NM_174299.3    |
|        | Reverse | CTCCTTCAGGAACAGCCACCAA     |                |
| CXCL8  | Forward | GAGAGTGATTGAGAGTGGACCAC    | NM_173925.2    |
|        | Reverse | CACAACCCTCTGCACCCAGTTT     |                |
| DACT2  | Forward | CTACACCAGGAGCGACTCAGAG     | XM_024997160.1 |
|        | Reverse | ACTCACGGTCTCCGAATCGGTT     |                |
| EGF    | Forward | TGCGATGCCAAGCAGTCTGTGA     | XM_024993778.1 |
|        | Reverse | GCATAGCCCAATCTGAGAACCAC    |                |

|          |         |                          |                |
|----------|---------|--------------------------|----------------|
| ESR1     | Forward | GCTTACTGACCAACCTGGCAGA   | NM_001001443.1 |
|          | Reverse | GGATCTCTAGCCAGGCACATTC   |                |
| ESR2     | Forward | ATGGAGTCTGGTCGTGTGAAGG   | NM_174051.3    |
|          | Reverse | TAACACTTCCGAAGTCGGCAGG   |                |
| Fas      | Forward | GGACCCAGAATACCAAGTGCAG   | NM_174662.2    |
|          | Reverse | GTTGCTGGTGAGTGTGCATTCC   |                |
| FASLG    | Forward | GGTTCTGGTTGCCTTGGTAGGA   | NM_001098859.2 |
|          | Reverse | CTGTGTGCATCTGGCTGGTAGA   |                |
| FOXO3    | Forward | TCTACGAGTGGATGGTGC GTTG  | NM_001206083.1 |
|          | Reverse | CTCTTGCCAGTTCCTCATTCTG   |                |
| GAPDH    | Forward | TGACCCCTTCATTGACCTTC     | NM_001034034.2 |
|          | Reverse | TACTCAGCACCAGCATCACC     |                |
| GPER1    | Forward | TTCCGCGAGAAGATGACCATCC   | XM_024985174.1 |
|          | Reverse | TAGTACCGCTCGTGCAGGTTGA   |                |
| GRB2     | Forward | GAAATGCTTAGCAAACAGCGGCA  | NM_001034630.1 |
|          | Reverse | TCCATCTCGGAGCACCTTGAAG   |                |
| HPRT1    | Forward | CATTATGCTGAGGATTTGGAAAGG | NM_001034035.2 |
|          | Reverse | CTTGAGCACACAGAGGGCTACA   |                |
| HRAS     | Forward | ACGCACTGTGGAATCTCGGCAG   | NM_001242347.1 |
|          | Reverse | TCACGCACCAACGTGTAGAAGG   |                |
| HSD17B6  | Forward | CCAGCATTCTGGGAAGAGTTGC   | NM_001035395.2 |
|          | Reverse | CCGTTCTGAAGTAGCCAGGTTT   |                |
| HSF1     | Forward | CAGCTGATGAAGGGGAAGCA     | NM_001076809.1 |
|          | Reverse | TGGATGAGCTTGTGACGACT     |                |
| HSP90AA1 | Forward | TCTGCCTCTGGTGATGAGATGG   | NM_001012670.2 |
|          | Reverse | CGTTCCACAAAGGCTGAGTTAGC  |                |
| HSPA1A   | Forward | ACCTTCGACGTGTCCATCCTGA   | NM_203322.3    |
|          | Reverse | TCCTCCACGAAGTGGTTCACCA   |                |
| IGFBP3   | Forward | CGCTACAAAGTTGACTACGAGTC  | NM_174556.1    |
|          | Reverse | GTCTTCCATTTCTCTACGGCAGG  |                |
| IGFBP5   | Forward | CGTGCTGTGTACCTGCCCAATT   | NM_001105327.2 |
|          | Reverse | ACTTGTCCACGCACCAGCAGAT   |                |
| IL1A     | Forward | TGTATGTGACTGCCCAAGATGAAG | NM_174092.1    |
|          | Reverse | AGAGGAGGTTGGTCTCACTACC   |                |
| IL1B     | Forward | CCACAGACCTTCCAGGAGAATG   | NM_174093.1    |
|          | Reverse | GTGCAGTTCAGTGATCGTACAGG  |                |
| IL-6     | Forward | AGACAGCCACTCACCTCTCAG    | NM_173923.2    |
|          | Reverse | TTCTGCCAGTGCCTCTTTGCTG   |                |
| INSIG1   | Forward | TTTTCTCAGGAGGCGTCACGGT   | NM_001077909.1 |
|          | Reverse | TCCTTGCTCTCAGAATCGGTGG   |                |
| LBP      | Forward | TCAGCATCTCCGACTCCTCCAT   | NM_001038674.2 |
|          | Reverse | CAGGAGGTTGACCGAAATGCTG   |                |
| LCA5     | Forward | ATCGTCTGCCAAAGTCCTCTCC   | NM_001195068.1 |
|          | Reverse | CTTCTGGCTTGAAGTCTTCCATG  |                |
| LPL      | Forward | CTGCTGGCATTGCAGGAAGTCT   | NM_001075120.1 |
|          | Reverse | CATCAGGAGAAAGACGACTCGG   |                |
| MAP1LC3A | Forward | GCTACAAGGGTGAGAAGCAGCT   | NM_001046175.1 |
|          | Reverse | CTGGTTCACCAGCAGGAAGAAG   |                |
| MAP1LC3B | Forward | GAGAAGCAGCTTCTGTTCTGG    | NM_001001169.1 |
|          | Reverse | GTGTCCGTTACCAACAGGAAG    |                |
| MAPK1    | Forward | ACACCAACCTCTCGTACATCGG   | NM_175793.2    |
|          | Reverse | TGGCAGTAGGTCTGGTCTCAA    |                |
| MAPK10   | Forward | GTGTGGAAGTGGGAGACTCAAC   | NM_001318200.1 |
|          | Reverse | GTCAAGGACAGCATCATACGCG   |                |
| MAPK14   | Forward | GAGCGTTACCAGAACCTGTCTC   | NM_001102174.1 |
|          | Reverse | AGTAACCGCAGTTCTCTGTAGGT  |                |

|              |         |                             |                |
|--------------|---------|-----------------------------|----------------|
| MAP2K1       | Forward | GGTGTTC AAGGTCTCCCACAAG     | NM_001130752.1 |
|              | Reverse | CCACGATGTACGGAGAGTTGCA      |                |
| MAPK3        | Forward | TGGCAAGCACTACCTGGATCAG      | NM_001110018.1 |
|              | Reverse | GCAGAGACTGTAGGTAGTTTCGG     |                |
| mTOR         | Forward | GGTTAACACCAAGCAGGTTTCAT     | XM_002694043.6 |
|              | Reverse | GTATGTGCGCACTGGACACCA       |                |
| NFKB1        | Forward | GCAGCACTACTTCTTGACCACC      | NM_001076409.1 |
|              | Reverse | TCTGCTCCTGAGCATTGACGTC      |                |
| PCNA         | Forward | CCTTGGTGCAGCTAACCCCTT       | NM_001034494.1 |
|              | Reverse | TTGGACATGCTTGGTGAGGTT       |                |
| PDK1         | Forward | CATGTCACGCTGGGTAATGAGG      | NM_001205957.1 |
|              | Reverse | CTCAACACGAGGCTTGGTGCA       |                |
| PIK3CB       | Forward | GGTAATCGGAGGATAGGGCAGT      | NM_001206047.1 |
|              | Reverse | CGGCAGTATGCTTCAAGGATGAC     |                |
| PIK3R2       | Forward | ATGGCACCTTCCTAGTCCGAGA      | NM_174576.2    |
|              | Reverse | CTCTGAGAAGCCATAGTGCCCA      |                |
| PRKACA       | Forward | CCACTATGCCATGAAGATCCTCG     | NM_174584.2    |
|              | Reverse | CGAGTTTGACGAGGAACGGAAAG     |                |
| PRL          | Forward | GAGGAGCAAACCAAACGGCTTC      | NM_173953.2    |
|              | Reverse | AAGGCGAGACTCTTCATCAGCC      |                |
| PRLR (long)  | Forward | AAGGCCATGTGGAAGATTG         | NM_001039726.2 |
|              | Reverse | GATGACTGTGAGGACCAGCA        |                |
| PRLR (short) | Forward | AGGTGACACTATAGAATAAGCAAC    | NM_174155.3    |
|              | Reverse | GTACGACTCACTATAGGGAAAGGC    |                |
| PTEN         | Forward | TGAGTTCCTCAGCCGTTACCT       | NM_001319898.1 |
|              | Reverse | GAGGTTTCCTCTGGTCCTGGTA      |                |
| PTGES        | Forward | GAGGATGCCCTGAGACACGGA       | NM_174443.2    |
|              | Reverse | CCAGAAAGGAGTAGACGAAGCC      |                |
| RAC1         | Forward | CGGTGAATCTGGGCTTATGGGA      | NM_174163.2    |
|              | Reverse | GGAGGTTATATCCTTACCGTACG     |                |
| RHEB         | Forward | CTATCTTTCCTCAGACATACTCCA    | NM_001031764.2 |
|              | Reverse | CACCATATCCAACAATTTGCCATG    |                |
| RHOA         | Forward | TCTGTCCCAACGTGCCCATCAT      | NM_176645.3    |
|              | Reverse | CTGCCTTCTCAGGTTTCACCG       |                |
| RSP9         | Forward | GGAGACCCTTCGAGAAGTCC        | NM_001101152.2 |
|              | Reverse | CTTCTCATCCAGCGTCAGC         |                |
| SOCS2        | Forward | GGGAACCTCAGTCACACAGGTTGG    | NM_177523.2    |
|              | Reverse | TGTTAGTAGGTAGTCTGAATGCGAAC  |                |
| SOCS3        | Forward | AGAAGATCCCCTCTGGTGTGAGC     | NM_174466.2    |
|              | Reverse | GTGACTTTCCTCGTAGGAGTCCAGG   |                |
| SQSTM1       | Forward | TGTGTAGCGTCTGCGAGGGAAA      | NM_176641.1    |
|              | Reverse | AGTGTCCGTGTTTCACCTTCCG      |                |
| STAT1        | Forward | ATGGCAGTCTGGCGGCTGAATT      | NM_00107790.1  |
|              | Reverse | CCAAACCAGGCTGGCACAATTG      |                |
| STAT3        | Forward | CTTGAGACCGAGGTGTATCACC      | NM_001012671.2 |
|              | Reverse | GGTCAGCATGTTGTACCACAGG      |                |
| STAT5A       | Forward | GAAACATCACAAAGCCCCATT       | NM_001012673.1 |
|              | Reverse | TGAAGCGCAACAAGAAGGTA        |                |
| STAT5B       | Forward | GTTTCGTGAACAAGCAACAGGC      | NM_174617.4    |
|              | Reverse | GGCATCAGATTCCAAAACATTCCTTCC |                |
| TEAD4        | Forward | GAAGGTCTGCTCTTTCGGCAAG      | XM_010805630.3 |
|              | Reverse | GAGGTGCTTGAGCTTGTGGATG      |                |
| TEKT3        | Forward | GGACAAGACTGCCTTCTGAAG       | NM_001099019.2 |
|              | Reverse | GTCTGGATGGTGTCTGCAACCT      |                |
| TFEB         | Forward | CCTGGAGATGACCAACAAGCAG      | NM_001205666.1 |
|              | Reverse | TAGGCAGCTCCTGCTTACCAC       |                |

---

|       |         |                         |                |
|-------|---------|-------------------------|----------------|
| TGFB1 | Forward | CCTGAGCCAGAGGGGACTAC    | NM_001166068.1 |
|       | Reverse | GCTCGGACGTGTTGAAGAAC    |                |
| TGFB3 | Forward | CTAAGCGGAATGAGCAGAGGATC | NM_001101183.1 |
|       | Reverse | TCTCAACAGCCACTCACGCACA  |                |
| TLR4  | Forward | ACTGCAGCTTCAACCGTATC    | NM_174198.6    |
|       | Reverse | TAAAGGCTCTGCACACATCA    |                |
| TNF   | Forward | TAACAAGCCGGTAGCCCACG    | NM_173966.3    |
|       | Reverse | TCTTGATGGCAGACAGGATG    |                |
| TNFR1 | Forward | CCGCTTCAGAAAACCACCTCAG  | NM_174674.2    |
|       | Reverse | ATGCCGGTACTGGTTCTTCCTG  |                |
| ULK1  | Forward | GCAAGGACTCTTCCTGTGACAC  | NM_001205927.1 |
|       | Reverse | CCACTGCACATCAGGCTGTCTG  |                |
| VEGFA | Forward | TTGCCTTGCTGCTCTACCTCCA  | NM_001316956.1 |
|       | Reverse | GATGGCAGTAGCTGCGCTGATA  |                |
| WIF1  | Forward | GGTGCCGAAATGGAGGCTTTTG  | NM_001075996.1 |
|       | Reverse | GATGCAGAAACCAGGAGTCACAC |                |

---
